# Supplementary material for: Promotion of electrochemical reduction of CO2 over the Cu2O–Cu(111) interface assisted by oxygen vacancies
Source: Royal Society of Chemistry journal article supplement (doi:10.1039/d4tc05461j), 2025-01-01
Supplement: d4tc05461j1.pdf [file d4tc05461j1.pdf]

Supplementary Information

## Promotion of Electrochemical Reduction of CO<sub>2</sub> over Cu<sub>2</sub>O-Cu (111) Interface Assisted by Oxygen Vacancies

Shuang Xu<sup>#</sup>, Lei Yang<sup>#</sup>, Congya Wang, Liwei Pan, Jing Zhang, Yaling Wang, Hexiang Zhong\*

### Supplementary Note 1. Faraday efficiency calculation for ECR

In this chapter, Faraday efficiency (FE) serves as a critical metric for assessing the product selectivity in the electrocatalytic reduction of CO<sub>2</sub> by a catalyst. Faraday efficiency refers to the percentage of electricity that is effectively utilized in converting CO<sub>2</sub> into a specific product, relative to the total electricity consumed throughout the reaction process.

The Faraday efficiency of the gas product is calculated as follows:

$$FE_j = \frac{nfV_jvP_0}{RT_0I_{total}} \times 100\% \#(1)$$

Let  $n$  represent the number of electrons transferred from a single CO<sub>2</sub> molecule to a gaseous product, with  $n$  having a value of 8. The Faraday constant, denoted by  $F$ , is given as 96485 C mol<sup>-1</sup>. The volume percentage of the gaseous product is represented by  $V_j$ . The flow rate of the gas into the gas chromatograph is denoted by  $v$ , measured in mL min<sup>-1</sup>. The standard atmospheric pressure,  $P_0$ , is 1.01×10<sup>5</sup> Pa. The gas constant,  $R$ , is 8.314 J mol<sup>-1</sup> K<sup>-1</sup>. The absolute zero temperature,  $T_0$ , is 273.15 K. Lastly,  $I_{total}$  denotes the total current during the reaction, measured in mA.

The Faraday efficiency of the liquid phase product is calculated as follows:

$$FE = \frac{nFCV}{\int_0^t Idt} \times 100\% \#(2)$$

Where  $n$  represents the number of electrons transferred from a single CO<sub>2</sub> molecule to a gaseous product, with a value of 2;  $F$  is Faraday's constant, which is 96485 C mol<sup>-1</sup>;  $C$  is the concentration of formate ions in the electrolyte, measured in mol L<sup>-1</sup>;  $V$  is the volume of the electrolyte, measured in L;  $I$  is the current intensity during the reaction, measured in amperes (A); and  $t$  is the reaction time, measured in s.

### Supplementary Note 2. Crystal surface characterized by selected area electron diffraction (SAED) analysis

Complementary selected-area electron diffraction (SAED) analysis (**Fig. S1**) revealed characteristic ring-like diffraction patterns, which conclusively confirm the polycrystalline structure of the synthesized material. Combined with high-resolution transmission electron microscopy images, this data demonstrates the dominance of the (111) crystal plane in the bulk phase.

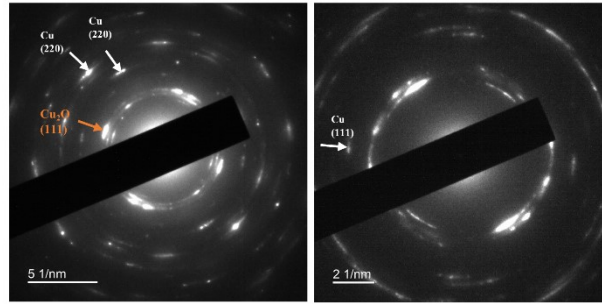

**Figure S1.** The selected-area electron diffraction (SAED) analysis images of OR-Cu/CM catalyst

### Supplementary Note 3. Surface composition characterized by X-ray photoelectron spectroscopy

The chemical components and states of the CM, O-Cu/CM and OR-Cu/CM catalysts were further explored by XPS. Elements including O, C and Cu can be observed in the full range XPS survey of these samples.

| Atomic | CM    | O-Cu/CM | OR-Cu/CM |
|--------|-------|---------|----------|
| C      | 75.4  | 54.74   | 76.66    |
| Cu     | 9.08  | 4.43    | 8.26     |
| O      | 15.52 | 40.84   | 15.08    |

**Table S1.** Atomic content of C, Cu and O in CM, O-Cu/CM and OR-Cu/CM catalyst

### Supplementary Note 4. Electrochemical characterization of electrocatalyst

As shown in **Table S2**, in order to assess the activity of the electrocatalysts, Electrochemical Impedance Spectroscopy (EIS) were performed on the prepared OR-Cu/CM, O-Cu/CM and CM electrodes in  $N_2$  saturated 0.5 M KCl solution to compare the performance of the three mesh electrodes in catalyzing the  $CO_2$  reduction. **Fig. S2. (a)-(c)** Cyclic voltammograms of copper mesh (geometrical area of  $2\text{ cm}^2$ ) in nitrogen saturated 0.1 M KCl after different treatments in the region of  $-0.55\text{ V}$  to  $-0.25\text{ V}$ . at scanning rates from 100 to  $300\text{ mV s}^{-1}$ . All pretreatment reactions All pretreatment reactions were carried out in 0.1 M KCl saturated with carbon dioxide. Plot as a function of scan rate. Double layer capacitance (Cdl) calculated from the slope is also shown Double layer capacitance (Cdl) calculated from the slope.

| Electrodes | $R_s$ | $R_{ct}$ |
|------------|-------|----------|
| CM         | 5.016 | 1.914    |
| O-Cu/CM    | 6.122 | 2.239    |
| OR-Cu/CM   | 4.952 | 0.01202  |

**Table S2.** The  $R_s$  and  $R_{ct}$  of CM, O-Cu/CM and OR-Cu/CM catalyst

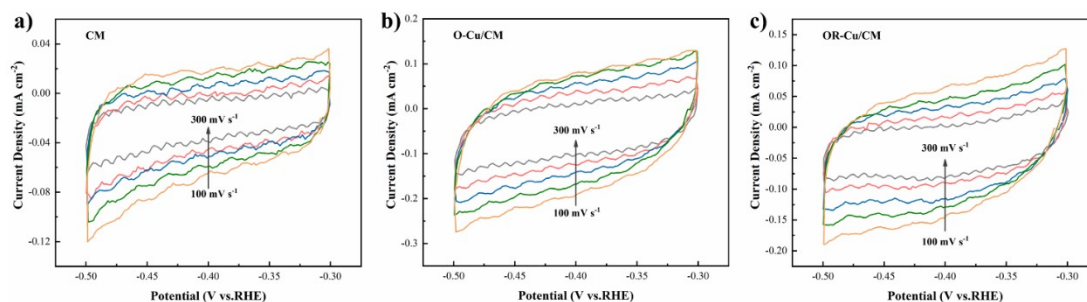

**Figure S2.** The cyclic voltammetry curve (CV) of CM, O-Cu/CM and OR-Cu/CM catalyst (a, b, c) in CO<sub>2</sub>-saturated 0.5 M KCl.

## Supplementary Note 5. Performance comparison and material design of current and previous copper-based catalysts

To evaluate the material design and performance superiority of the electrocatalysts, data from existing and prior copper-based catalysts were compiled for benchmarking the performance of electrocatalytic CO<sub>2</sub> reduction to methane (**Table S3**). A key result of this catalyst is the oxygen-deficient Cu<sub>2</sub>O-Cu interface formed through continuous copper substrate-mediated anodic oxidation and electrochemical reduction. As indicated in **Table S3**, the OR-Cu/CM catalyst exhibits CH<sub>4</sub> selectivity is relatively high among the reported values. Additionally, it achieves high current density under low overpotentials.

**Table S3.** Performance comparison and material design of current and previous copper-based catalysts in CO<sub>2</sub> electroreduction to CH<sub>4</sub>.

| Catalyst                      | Potential<br>(V vs. RHE) | j<br>(mA · cm <sup>-2</sup> ) | FE <sub>CH<sub>4</sub></sub><br>(%) | Reactor/<br>Electrolyte              | Material<br>Design                                                                                                                                                                                                                                                                                                                                                             | Ref.      |
|-------------------------------|--------------------------|-------------------------------|-------------------------------------|--------------------------------------|--------------------------------------------------------------------------------------------------------------------------------------------------------------------------------------------------------------------------------------------------------------------------------------------------------------------------------------------------------------------------------|-----------|
| Cu <sub>2</sub> O-Cu<br>(111) | -1.38                    | ~41.5 <sup>b</sup>            | ~56.6                               | H-cell<br>0.5 M KCl                  | Continuous anodic oxidation and electrochemical reduction driven by a copper substrate to create an oxygen-deficient Cu <sub>2</sub> O-Cu interface.                                                                                                                                                                                                                           | This work |
| Cu-NC-1-4                     | -1.60                    | ~41 <sup>a</sup>              | ~67.2                               | H-cell<br>0.5 M<br>KHCO <sub>3</sub> | Copper single-atom catalysts (Cu-NC) supported on a carbon substrate are synthesized using a one-pot method. Highly-dispersed copper nanoparticles (Cu NPs) were directly synthesized via electrochemical reduction of Cu-MOF-74, utilizing its one-dimensional porous architecture both as a precursor and a structural template.                                             | 1         |
| m-Cu NPs                      | -1.30                    | ~7.5 <sup>b</sup>             | ~50                                 | Flow-cell<br>1 M KHCO <sub>3</sub>   | Atomic Cu sites are engineered within the nitrogen cavities of graphitic carbon nitride (g-C <sub>3</sub> N <sub>4</sub> ). The design of a copper porphyrin with donor-acceptor architecture integrates an amino group as electron-donating moiety at the molecular periphery, which synergistically coordinates with the central CuN <sub>4</sub> electron-accepting center. | 2         |
| Cu0.05-CN                     | -1.20                    | ~7.97 <sup>b</sup>            | ~49                                 | H-cell<br>0.1 M<br>KHCO <sub>3</sub> |                                                                                                                                                                                                                                                                                                                                                                                | 3         |
| CuTAPP                        | -1.63                    | ~290.5 <sup>b</sup>           | ~54.8                               | H-cell<br>0.5 M<br>KHCO <sub>3</sub> |                                                                                                                                                                                                                                                                                                                                                                                | 4         |

a Total current density distribution across experimental groups.

b CH<sub>4</sub> partial current density profiles within experimental groups.

## References

- 1 Y. Liu, M. Zhang, K. Bao, H. Huang and Z. Kang, *ChemSusChem*, 2024, DOI: 10.1002/cssc.202401314, e202401314.
- 2 M. K. Kim, H. J. Kim, H. Lim, Y. Kwon and H. M. Jeong, *Electrochim Acta*, 2019, **306**, 28-34.
- 3 M. Li, F. Zhang, M. Kuang, Y. Ma, T. Liao, Z. Sun, W. Luo, W. Jiang and J. Yang, *Nano-Micro Lett*, 2023, **15**, 238.
- 4 P. Yu, X. Lv, Q. Wang, H. Huang, W. Weng, C. Peng, L. Zhang and G. Zheng, *Small*, 2023, **19**, 2205730.
